# Supplementary material for: Intrinsic catalytic activity of an acidic ionic liquid as a solvent for quinazoline synthesis
Source: Royal Society of Chemistry journal article supplement (doi:10.1039/c2cy20160g), 2012-01-01

## **Intrinsic Catalytic Activity of Acidic Ionic Liquid as Solvent for Quinazoline Synthesis**

Vikas S. Patil, Vikas S. Padalkar, Amol Choudhary, and N. Sekar\*

Institute of Chemical Technology (Formerly UDCT),

N. P. Marg, Matunga, Mumbai - 400 019.

Maharashtra, India.

---

|                                                  |          |
|--------------------------------------------------|----------|
| <b>Figure 1: <sup>1</sup>H NMR 4a:</b>           | <b>2</b> |
| <b>Figure 3: Splitting <sup>1</sup>H NMR 4a:</b> | <b>3</b> |
| <b>Figure 3: <sup>13</sup>C NMR 4a:</b>          | <b>4</b> |

Figure 1: <sup>1</sup>H NMR 4a:

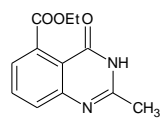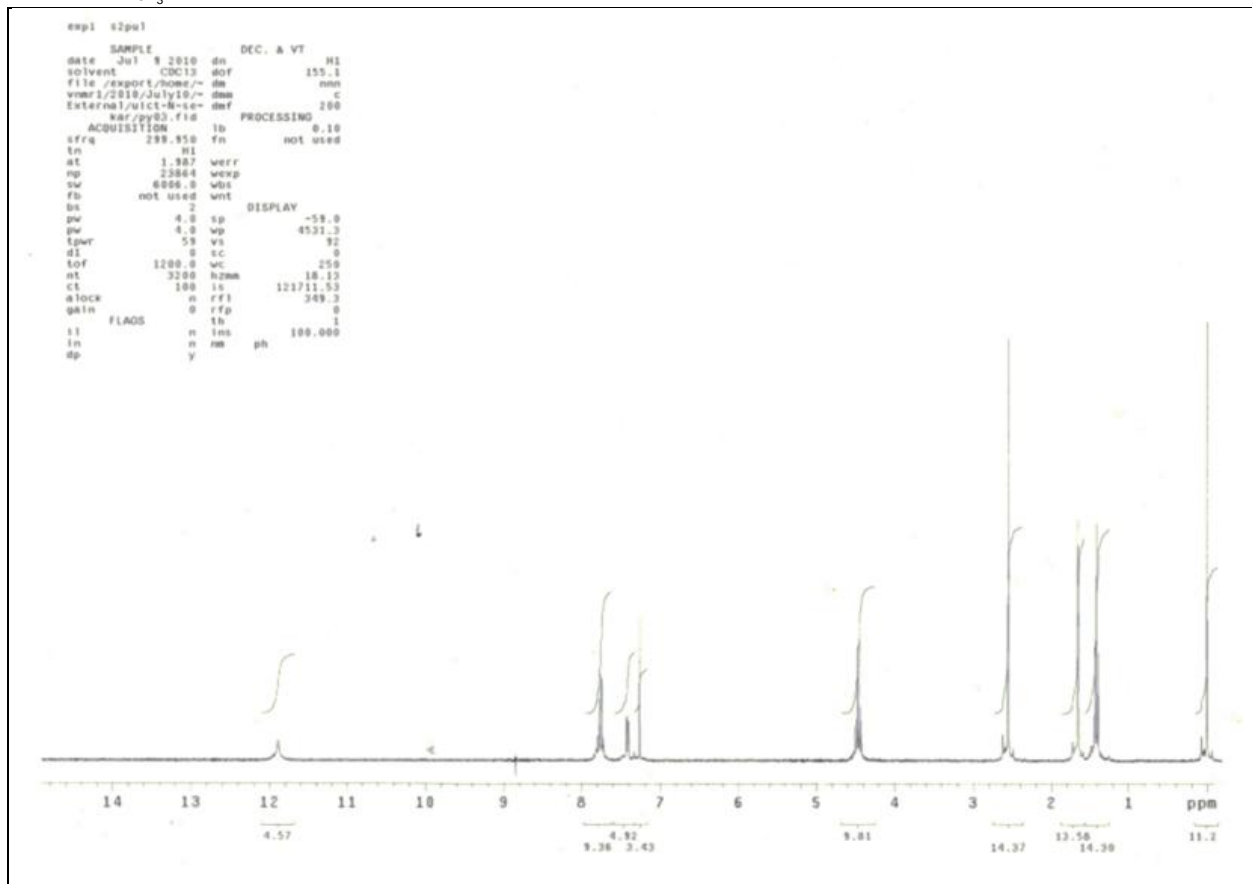

**Figure 2: Splitting 1H NMR 4a:**

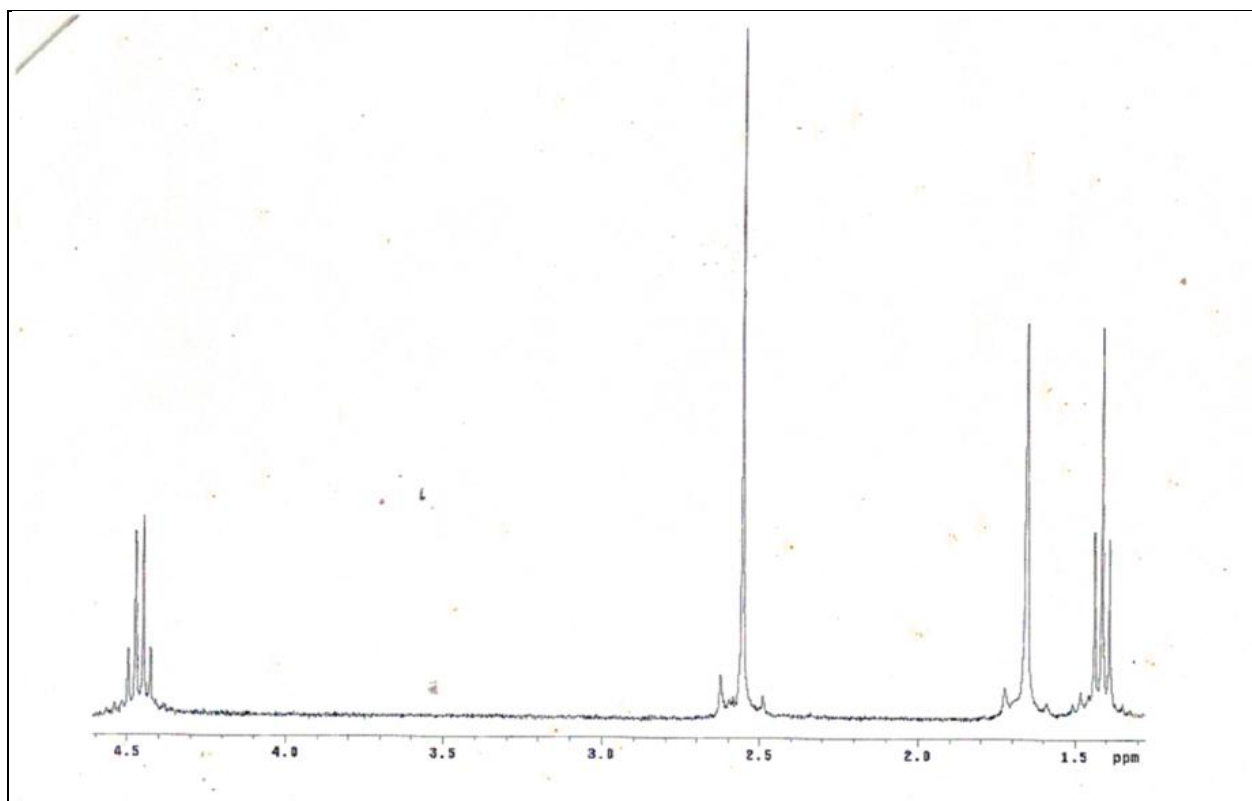

Figure 3: <sup>13</sup>C NMR 4a:

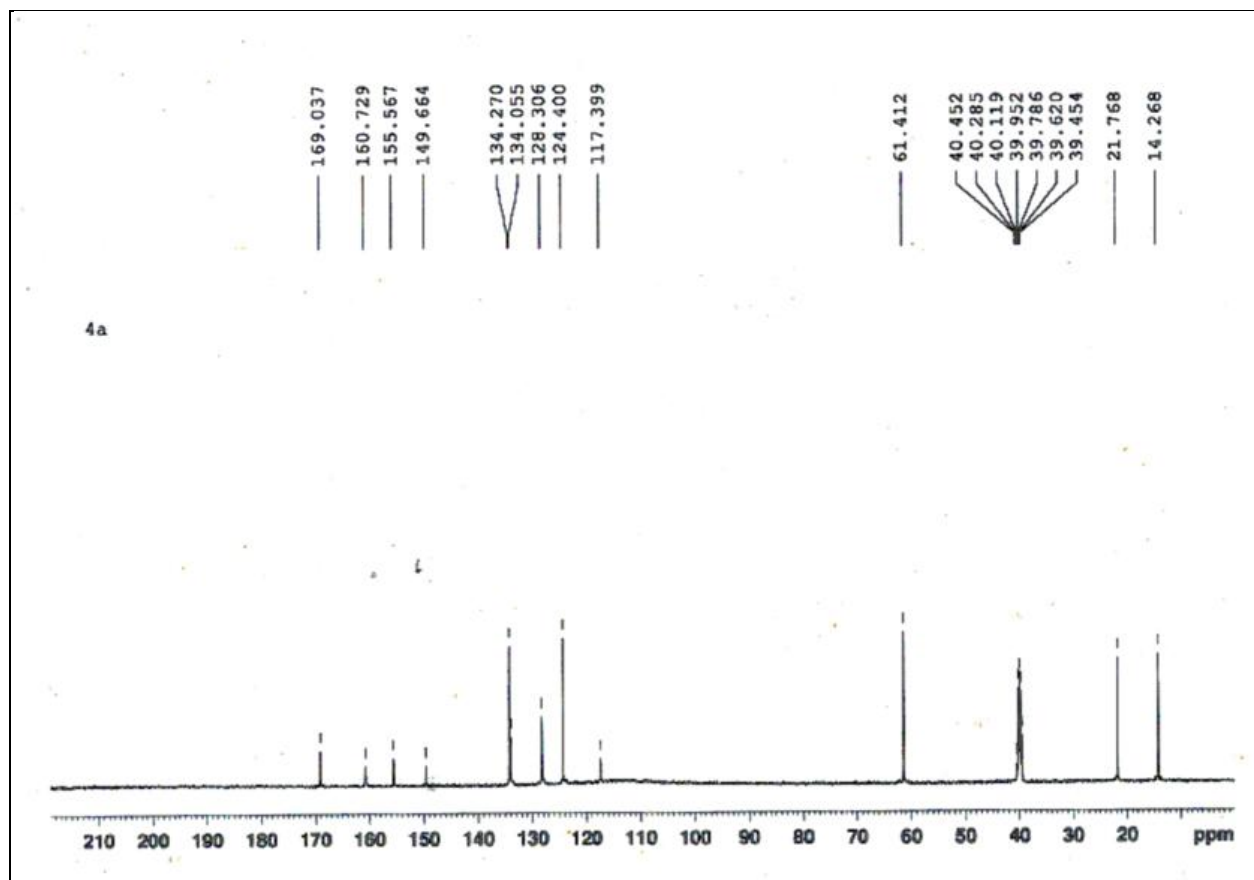

Supplement: c2cy20160g.pdf [file c2cy20160g.pdf]
